# Supplementary material for: Vaccination and Trust in the National Health System among HIV+ Patients: An Italian Cross-Sectional Survey
Source: MDPI journal article supplement (doi:10.3390/vaccines11081315), 2023-08-02
Supplement: s1 [file s1]

## Questionario di rilevazione delle conoscenze in ambito vaccinale nei soggetti HIV-positivi

### 1) Cittadinanza

- ☐ Italiana ☐ Altro specificare.....

### 2) Età |\_\_|\_\_|

### 3) Genere

- ☐ Uomo  
☐ Donna  
☐ Non binario/terzo genere/altro

### 3) Stato civile

- ☐ Libero/a o vedovo/a o divorziato/a  
☐ Coniugato/a o convivente

### 4) Titolo di studio

- ☐ Nessuno  
☐ Elementare  
☐ Medie inferiori  
☐ Medie superiori/scuole professionali  
☐ Laurea o superiore

### 5) Occupazione attuale:

- ☐ Casalingo/a  
☐ Dirigente – Imprenditore/imprenditrice  
☐ Impiegato/a - Insegnante  
☐ In cerca di occupazione  
☐ Libero/a professionista  
☐ Operaio/a – Artigiano/a  
☐ Professionista Sanitario  
☐ Studente/essa  
☐ Altro (specificare.....)

**6) In questo periodo della sua vita è attratto/ha rapporti sessuali**

- ☐ Solo con uomini
- ☐ Prevalentemente con uomini
- ☐ In eguale misura con uomini e donne
- ☐ Prevalentemente con donne
- ☐ Solo con donne
- ☐ Né con uomini né con donne
- ☐ Preferisco non rispondere

**7) Negli ultimi sei mesi ha avuto rapporti sessuali non protetti**

- ☐ Sì
- ☐ No
- ☐ Preferisco non rispondere

**8) Negli ultimi sei mesi ha fatto uso di sostanze stupefacenti iniettive**

- ☐ Sì
- ☐ No
- ☐ Preferisco non rispondere

**9) Ha ricevuto informazioni riguardo i vaccini da personale sanitario?**

- ☐ Sì
- ☐ No

**9bis) Se sì, da chi ha ricevuto informazioni (possibile più di una risposta)?**

- ☐ Ambulatorio HIV
- ☐ Centro Vaccinale
- ☐ Medico di Base
- ☐ Altro (specificare): .....

**10) Si è informato/a autonomamente sui vaccini?**

- ☐ Sì
- ☐ No

**10bis) Se sì, dove ha ricercato informazioni (possibile più di una risposta)?**

- ☐ Internet e social media
- ☐ Televisione
- ☐ Riviste e siti istituzionali
- ☐ Amici e passaparola
- ☐ Altro (specificare): .....

11) Ha effettuato esami per valutare la possibilità di contrarre qualche malattia prevenibile con vaccino?

- ☐ Sì  
☐ No

11bis) Se sì, quali?

---

---

---

12) Per quale delle seguenti delle patologie è stato/a vaccinato/a ?

|     |                                                                                  | Sì | No | Non so/Non ricordo |
|-----|----------------------------------------------------------------------------------|----|----|--------------------|
| 12a | Epatite A                                                                        |    |    |                    |
| 12b | Epatite B                                                                        |    |    |                    |
| 12c | Tetano (almeno un richiamo negli ultimi 10 anni)                                 |    |    |                    |
| 12d | Difterite                                                                        |    |    |                    |
| 12e | Pertosse                                                                         |    |    |                    |
| 12f | HPV (Papilloma)                                                                  |    |    |                    |
| 12g | Pneumococco                                                                      |    |    |                    |
| 12h | Influenza (nell'ultima stagione influenzale)                                     |    |    |                    |
| 12i | Varicella                                                                        |    |    |                    |
| 12l | Morbillo                                                                         |    |    |                    |
| 12m | Parotite (Orecchioni)                                                            |    |    |                    |
| 12n | Rosolia                                                                          |    |    |                    |
| 12o | Poliomielite                                                                     |    |    |                    |
| 12p | Meningococco                                                                     |    |    |                    |
| 12q | Haemophilus Influenzae Tipo B (causa di meningite, osteomielite, pericardite...) |    |    |                    |
| 12r | Herpes Zoster<br>(Fuoco di Sant'Antonio)                                         |    |    |                    |
| 12s | Covid-19                                                                         |    |    |                    |
| 12t | Altro (Specificare) _____                                                        |    |    |                    |

13) Ha intenzione di vaccinarsi per le seguenti patologie ?

|     |                                                                                         | Sì | No | Non so | Sono già vaccinato/a |
|-----|-----------------------------------------------------------------------------------------|----|----|--------|----------------------|
| 13a | <i>Epatite A</i>                                                                        |    |    |        |                      |
| 13b | <i>Epatite B</i>                                                                        |    |    |        |                      |
| 13c | <i>Tetano</i>                                                                           |    |    |        |                      |
| 13d | <i>Difterite</i>                                                                        |    |    |        |                      |
| 13e | <i>Pertosse</i>                                                                         |    |    |        |                      |
| 13f | <i>HPV (Papilloma)</i>                                                                  |    |    |        |                      |
| 13g | <i>Pneumococco</i>                                                                      |    |    |        |                      |
| 13h | <i>Influenza</i>                                                                        |    |    |        |                      |
| 13i | <i>Varicella</i>                                                                        |    |    |        |                      |
| 13l | <i>Morbillo</i>                                                                         |    |    |        |                      |
| 13m | <i>Parotite (Orecchioni)</i>                                                            |    |    |        |                      |
| 13n | <i>Rosolia</i>                                                                          |    |    |        |                      |
| 13o | <i>Poliomielite</i>                                                                     |    |    |        |                      |
| 13p | <i>Meningococco</i>                                                                     |    |    |        |                      |
| 13q | <i>Haemophilus Influenzae Tipo B (causa di meningite, osteomielite, pericardite...)</i> |    |    |        |                      |
| 13r | <i>Herpes Zoster<br/>(Fuoco di Sant'Antonio)</i>                                        |    |    |        |                      |
| 13s | <i>Covid-19</i>                                                                         |    |    |        |                      |
| 13t | <i>Altro (Specificare)_____</i>                                                         |    |    |        |                      |

**14) Quanto concorda con le seguenti affermazioni?**

|                                                                                                                      | <b>Per nulla</b> | <b>Poco</b> | <b>Abbastanza</b> | <b>Molto</b> |
|----------------------------------------------------------------------------------------------------------------------|------------------|-------------|-------------------|--------------|
| 14a) Credo nelle informazioni fornite dagli operatori sanitari                                                       |                  |             |                   |              |
| 14b) Gli operatori del Sistema Sanitario Nazionale sono preparati e aggiornati sulle vaccinazioni                    |                  |             |                   |              |
| 14c) Ho più fiducia in operatori esterni al Sistema Sanitario Nazionale                                              |                  |             |                   |              |
| 14d) Chi non vaccina viene colpevolizzato dagli operatori del Sistema Sanitario Nazionale                            |                  |             |                   |              |
| 14e) L'organizzazione sanitaria è flessibile nel modificare tempi e modi delle vaccinazioni su richiesta             |                  |             |                   |              |
| 14f) I vaccini servono più al bene della comunità che al bene del singolo                                            |                  |             |                   |              |
| 14g) Gli operatori del Sistema Sanitario Nazionale hanno interesse economico nelle vaccinazioni                      |                  |             |                   |              |
| 14h) Gli operatori del Sistema Sanitario Nazionale danno informazioni solo sui benefici e non sui rischi dei vaccini |                  |             |                   |              |
| 14i) I vaccini sono un'imposizione e non una libera scelta                                                           |                  |             |                   |              |

|                                                                                      | A. Ritiene di poter contrarre le seguenti malattie? |      |            |       | B. Quanto ritiene gravi o pericolose le seguenti malattie? |      |            |       |
|--------------------------------------------------------------------------------------|-----------------------------------------------------|------|------------|-------|------------------------------------------------------------|------|------------|-------|
|                                                                                      | Per nulla                                           | Poco | Abbastanza | Molto | Per nulla                                                  | Poco | Abbastanza | Molto |
| 15) Epatite A                                                                        |                                                     |      |            |       |                                                            |      |            |       |
| 16) Epatite B                                                                        |                                                     |      |            |       |                                                            |      |            |       |
| 17) Tetano                                                                           |                                                     |      |            |       |                                                            |      |            |       |
| 18) Difterite                                                                        |                                                     |      |            |       |                                                            |      |            |       |
| 19) Pertosse                                                                         |                                                     |      |            |       |                                                            |      |            |       |
| 20) HPV (Papilloma)                                                                  |                                                     |      |            |       |                                                            |      |            |       |
| 21) Pneumococco                                                                      |                                                     |      |            |       |                                                            |      |            |       |
| 22) Influenza                                                                        |                                                     |      |            |       |                                                            |      |            |       |
| 23) Varicella                                                                        |                                                     |      |            |       |                                                            |      |            |       |
| 24) Morbillo                                                                         |                                                     |      |            |       |                                                            |      |            |       |
| 25) Parotite (Orecchioni)                                                            |                                                     |      |            |       |                                                            |      |            |       |
| 26) Rosolia                                                                          |                                                     |      |            |       |                                                            |      |            |       |
| 27) Poliomielite                                                                     |                                                     |      |            |       |                                                            |      |            |       |
| 28) Meningococco                                                                     |                                                     |      |            |       |                                                            |      |            |       |
| 29) Haemophilus Influenzae Tipo B (causa di meningite, osteomielite, pericardite...) |                                                     |      |            |       |                                                            |      |            |       |
| 30) Herpes Zoster (Fuoco di Sant'Antonio)                                            |                                                     |      |            |       |                                                            |      |            |       |
| 31) Covid-19                                                                         |                                                     |      |            |       |                                                            |      |            |       |

32) Relativamente alla patologia Covid-19 ritiene che la sieropositività possa metterla a maggior rischio di complicanze?

- ☐ Sì  
☐ No  
☐ Non so/non voglio rispondere

33) Relativamente alla vaccinazione anti-Covid-19 ritiene che la sieropositività possa metterla a maggior rischio di eventi avversi?

- ☐ Sì  
☐ No  
☐ Non so/non voglio rispondere

*Per concludere, le chiederemo alcune informazioni riguardanti la sua condizione. Se non è sicuro delle risposte, può consultare il suo medico.*

34) Da quanti anni è a conoscenza di essere HIV-positivo?

\_\_\_\_\_

35) Attualmente assume terapia antiretrovirale?

- ☐ Sì  
☐ No  
☐ Non so/non voglio rispondere

36) Convive con altre persone sieropositive?

- ☐ Sì  
☐ No  
☐ Non so/non voglio rispondere

37) Qual è la sua conta linfocitaria? \_\_\_\_\_

38) Qual è la sua carica virale? \_\_\_\_\_

39) E' affetto da patologie croniche?

- ☐ Sì  
☐ No

39bis) Se sì, quali?

\_\_\_\_\_  
\_\_\_\_\_

Grazie per la collaborazione
